1 **Do all frogs swim alike? The effect of ecological specialization on swimming kinematics in frogs.**

2 Pavla Robovska-Havelkova<sup>1</sup>, Peter Aerts<sup>2,3</sup>, Zbynek Rocek<sup>4</sup>, Tomas Prikryl<sup>4</sup>, Anne-Claire Fabre<sup>5</sup> and  
3 Anthony Herrel<sup>6,7</sup>

4

5 1. Department of Zoology, Faculty of Science, University of South Bohemia, České Budejovice, Czech  
6 Republic.

7 2. Department of Biology, University of Antwerp, Universiteitsplein 1, B-2610 Antwerpen, Belgium.

8 3. Department of Movement and Sports Sciences, University of Ghent, Watersportlaan 2, B-9000 Ghent,  
9 Belgium.

10 4. Department of Paleobiology, Geological Institute, Academy of Sciences, Prague, Czech Republic.

11 5. Evolutionary Anthropology, Duke University, Durham, North Carolina, 27708-0383, USA.

12 6. UMR 7179 C.N.R.S/M.N.H.N., Département d'Ecologie et de Gestion de la Biodiversité, 57 rue Cuvier,  
13 Case postale 55, 75231, Paris Cedex 5, France.

14 7. Ghent University, Evolutionary Morphology of Vertebrates, K.L. Ledeganckstraat 35, B-9000 Gent,  
15 Belgium.

16 **Running title:** frog swimming kinematics

17 # pages: 17

18 # tables: 4

19 # figures: 6; supplementary figures: 6

20

---

21 *Address for correspondence:*

22 Anthony Herrel

23 UMR 7179 C.N.R.S/M.N.H.N.

24 Département d'Ecologie et Gestion de la Biodiversité

25 57 rue Cuvier, Case postale 55

phone++33-140798120

26 75231 Paris Cedex 5

fax : ++33-140793773

27 France

e-mail : [anthony.herrel@mnhn.fr](mailto:anthony.herrel@mnhn.fr)

28 **Abstract**

29 Frog locomotion has attracted wide scientific interest due to the unusual and derived morphology of the  
30 frog pelvic girdle and hind limb. Previous authors have suggested that the design of the frog locomotor  
31 system evolved towards a specialized jumping morphology early-on in the radiation of the group.  
32 However, data on locomotion in frogs are biased towards a few groups and most of the ecological and  
33 functional diversity remains unexplored. Here we examine the kinematics of swimming in eight species  
34 of frog with different ecologies. We use cineradiography to quantify movements of skeletal elements  
35 from the entire appendicular skeleton. Our results show that species with different ecologies do differ in  
36 the kinematics of swimming with the speed of limb extension and especially the kinematics of the mid-  
37 foot being different. Our results moreover suggest that this is not a phylogenetic effect as species from  
38 different clades with similar ecologies converge on the same swimming kinematics. These results  
39 suggest that it is important to analyze frog locomotion in a broader ecological and evolutionary context  
40 if one is to understand the evolutionary origins of this behavior.

## 41 Introduction

42 Frog locomotion has attracted wide scientific interest because of the unusual and highly derived  
43 morphology of these animals (Barclay, 1946; Estes and Reig, 1973; Zug, 1978; Frost et al., 2006). Frogs  
44 are characterized by a shortened trunk and tail, elongated ilia, and elongated hind limbs. This  
45 morphology has been interpreted as being associated with a jumping life style and thus it has been  
46 suggested that jumping evolved early-on in the evolution of the lineage (Gans and Parsons, 1966; Shubin  
47 and Jenkins, 1995; Jenkins and Shubin, 1998) and many recent studies have attempted to infer  
48 locomotion in basal frogs (Prikryl et al., 2009; Essner et al., 2010; Reilly and Jorgenses, 2011; Sigurdson  
49 et al., 2012; Venczel and Szentesi, 2012; Jorgensen and Reilly, 2013). However, kinematic and  
50 electromyographic studies indicate strong similarities between the mechanics of swimming and jumping  
51 in some frogs (Emerson and De Jongh, 1980; Peters et al., 1996; but see Nauwelaerts and Aerts, 2003),  
52 implying that morphological features associated with these two locomotor modes may not be that  
53 different. This may, in turn, complicate inferences of locomotor modes from anatomy as is often done  
54 for extinct animals. Despite their rather uniform morphology, frogs are an ecologically diverse and  
55 speciose group with over 5000 known species (Frost et al., 2006). Moreover, animals with different  
56 ecologies have evolved different morphologies and show similar levels of locomotor performance  
57 (Moen et al., 2013) suggesting that locomotion may differ in animals with different ecologies.

58 To date most of our knowledge on frog locomotion is based on data for a limited set of derived frogs  
59 including ranoids (mostly ranids and bufonids; Calow and Alexander, 1973; Lutz and Rome, 1994; Kamel  
60 et al., 1996; Peters et al., 1996; Olson and Marsh, 1998; Gillis and Biewener, 2000; Nauwelaerts and  
61 Aerts, 2002, 2003, 2006; Nauwelaerts et al., 2001, 2004, 2005a,b; Johansson and Lauder, 2004; Stamhuis  
62 and Nauwelaerts, 2005) and highly specialized aquatic pipids (Gal and Blake, 1988; Richards and  
63 Biewener, 2007; Richards, 2008; Clemente and Richards, 2013). A comparison of swimming kinematics  
64 between the highly specialized aquatic pipids and more generalized terrestrial species showed  
65 differences in joint kinematics indicating differences in the underlying propulsive strategies of swimming  
66 across species (Richards, 2010). Although these data suggest that frogs with different ecologies differ in  
67 their limb kinematics, this remains to be tested using a broader sample of species with different  
68 ecologies and from different phylogenetic backgrounds. For example, the only study on swimming in  
69 primitive leiopelmatid frogs demonstrated an alternative swimming pattern consisting of an asymmetric  
70 swimming gait (Abourachid and Green, 1999) that may be related to the low locomotor speeds observed  
71 in these animals (Nauwelaerts and Aerts, 2002).

72 Here we explore the diversity in hind limb kinematics during the propulsive phase of swimming in frogs  
73 by studying 8 species of frogs from different families and with different ecologies (Table 1; Fig. 1). We  
74 include both species with different ecologies (aquatic, terrestrial and semi-aquatic) and different  
75 phylogenetic affinities. Given the importance of pelvic girdle movements during locomotion in frogs  
76 (Emerson, 1976; 1979; Videler and Jorna, 1985) we decided to use cineradiography rather than typical  
77 external high-speed video recordings to quantify swimming kinematics. Specifically, we test the  
78 hypothesis that species with different ecologies will differ in the kinematics of limb movement during  
79 swimming, with aquatic species showing greater velocities of movement and greater angular  
80 displacements at the distal-most joints associated with the rotation-powered swimming style observed  
81 in highly specialized swimmers (Richards, 2010).

## 82 **Results**

### 83 *Descriptive kinematics*

84 Swimming in all species involved limb extension with significant movements at the hip, knee, and ankle  
85 (Figs. 3-5; Supplementary figures 1-6). Whereas terrestrial and semi-aquatic species showed a clear  
86 proximo-distal extension sequence starting at the hip and ending at the ankle, this was not the case in  
87 specialized aquatic species where extension was initiated at the level of the knee, followed by the hip  
88 and the ankle. However, the greatest differences were observed in the movements at the distal-most  
89 segments (i.e. mid-foot angles). Whereas in all species movements at the proximal foot were observed  
90 resulting in an extension of the foot fairly late in the kick, in specialized aquatics, the distal-most part of  
91 the foot (mid-foot 2) was extended throughout the extension cycle. In the other species this angle  
92 showed little change and the distal foot remained extended throughout the extension cycle. Movements  
93 in the highly specialized aquatic species were also more stereotyped with lower variability, especially at  
94 the distal-most segments as suggested by the fact that they occupy only a small part of the kinematic  
95 space (Fig. 6).

### 96 *Ecological differences*

97 A factor analysis performed on the mean kinematic variables per individual extracted four axes jointly  
98 explaining 79 percent of the overall variability in the data set (Table 3). Whereas the first axis (35.68%)  
99 was principally determined by extension of the limb, the velocity at the hip, knee, and ankle as well as  
100 the total angular change at the hip and knee, the second axis (18.42%) was determined by the changes

101 in mid-foot angle as well as the minimal midfoot angles (Table 3). The third axis (14.2%) was determined  
102 by the pelvic shift and the change in pelvic angle (Table 3). The fourth axis (10.85%) was determined by  
103 the relative velocity of the animal (Table 3).

104 A multivariate analysis of variance performed on the raw kinematic variables that showed scores greater  
105 than 0.7 on the first two axes indicated a highly significant difference in swimming kinematics in animals  
106 with different ecologies, irrespective of the fact whether *B. orientalis* was classified as aquatic or semi-  
107 aquatic (*B. orientalis* aquatic: Wilks' lambda = 0.095;  $F_{20,26} = 2.92$ ;  $P = 0.006$ ; *B. orientalis* semi-aquatic:  
108 Wilks' lambda = 0.040;  $F_{20,26} = 5.22$ ;  $P < 0.001$ ). For the analysis with *B. orientalis* classified as aquatic, the  
109 subsequent univariate anova's indicated that this difference was due to a significant effect on the delta  
110 knee angle, the delta hip angle, and the delta and minima of the midfoot 1 and midfoot 2 angles (Table  
111 4). Post-hoc tests indicated that differences were significant between aquatic and terrestrial species in  
112 the delta hip angle with terrestrial species having a larger overall rotation at the hip. Moreover,  
113 differences were significant between the semi-aquatic species on the one hand and the aquatic and  
114 terrestrial species on the other hand for all midfoot angles with semi-aquatic species having larger  
115 minimal angles yet smaller overall changes in angle. The only exception was for the minimal midfoot 2  
116 angle where aquatic and semi-aquatic species did not differ. For the analysis with *B. orientalis* classified  
117 as semi-aquatic the univariate anova's also indicated differences in the angular excursion at the hip and  
118 the midfoot (Table 4). Results of Bonferroni post-hoc tests showed identical results as the analyses with  
119 *B. orientalis* classified as aquatic.

## 120 *Phylogeny*

121 A plot of the phylogeny in the kinematic space constructed by using species means suggests that  
122 phylogeny is not driving the observed results (Fig. 6). For example, whereas the two terrestrial species *B.*  
123 *calamita* and *R. guttatus* are more closely related to *P. esculenta* they fall out with the terrestrial  
124 archeobatrachian *P. fuscus* (Fig. 6). Thus the structuring in the kinematic space represents ecological  
125 affinities rather than representing phylogeny. The factor analysis performed on the species means  
126 shows a similar structuring as that observed using the individual data.

## 127 **Discussion**

128 Our results showed interesting differences in swimming behavior between species with different  
129 ecologies. Semi-aquatic species stood out by the lack of changes in the midfoot angle during the  
130 extension phase which is maintained rather stable. This is in contrast to specialized aquatic species such

131 as *X. laevis* and terrestrial species such as *P. fuscus* and *R. guttatus* where the midfoot actively  
132 contributes to generating propulsion. These results confirm previously published data on frog swimming  
133 (Richards, 2010) that demonstrated that the highly specialized aquatic *X. laevis* obtained nearly 100% of  
134 the total thrust during swimming through foot rotation involving tarso-metatarsal extension. Other  
135 species such as the semi-aquatic *R. pipiens* or the terrestrial *B. americanus* had strong translational  
136 components to the kick. Interestingly, our analysis on species means suggest that terrestrial species had  
137 greater angular changes at the hip compared to aquatic and semi-aquatic species.

138 However, our results also show differences compared to previous studies. Notably, whereas Richards  
139 (2010) found that foot rotation was greater in *X. laevis* compared to *B. americanus* our results show that  
140 at least one of the bufonids (*R. guttatus*) shows greater foot rotation than *X. laevis*. The other species of  
141 bufonid included in our study (*B. calamita*), however, clustered with aquatic or semi-aquatic species  
142 depending on the classification of *B. orientalis* as aquatic or semi-aquatic (Fig. 6). Moreover, *B. calamita*  
143 also showed early knee extension as has been observed for *B. americanus* in contrast to the other  
144 terrestrial species in our data set (Fig. S2). This suggests that differences in kinematic strategies may  
145 exist within groups of closely related species with similar life-styles. Further studies exploring swimming  
146 strategies in terrestrial bufonids would be especially insightful in this context.

147 In addition to confirming previous results (Richards, 2010), our results show significant differences  
148 between species with different ecologies. Indeed, our kinematic analysis showed that terrestrial species  
149 were significantly different from aquatic and semi-aquatic ones. Moreover, as our analysis included both  
150 primitive and derived species, this suggests that it is not a phylogenetic effect, but likely driven by the  
151 constraints of locomotion in different media. This is confirmed by the analysis on species means where a  
152 plot of the phylogeny in the kinematic space showed that structuring is largely according to ecological  
153 grouping rather than phylogeny (Fig. 7). Although differences between species and ecological groups  
154 were rather robust, the *B. calamita* included in our data set fell within the kinematic space of both  
155 highly specialized aquatic and semi-aquatic species suggesting that interesting differences in locomotor  
156 strategies may exist within ecological groups as well. Moreover, our analysis on the individual means  
157 showed that one of the *P. esculenta* used in our analysis differed strongly from the other individual by  
158 showing much slower limb extension and a much lower contribution of the mid-foot to overall  
159 propulsion. This result is hard to explain given the tight clustering around the species means of all other  
160 individuals used in the analyses. One possible explanation may be that this was a sub-adult individual. If  
161 so this may suggest that locomotor strategies vary throughout ontogeny, yet this remains to be tested.

162 Of the kinematic variables measured, those associated with the sliding of the pelvis did not contribute to  
163 the overall variation in kinematics of swimming. Yet, the highly specialized sliding pelvis of pipids has  
164 previously been suggested to play an important role during swimming by increasing the length of the  
165 power stroke (Palmer, 1960; Videler and Jorna, 1985). Despite the fact that two pipids were included in  
166 our data set the average values of pelvic sliding were only slightly greater than those observed in other  
167 species that do not possess a high specialized sacral joint allowing extensive sliding of the pelvis  
168 (Supplementary figure S6). Moreover, rather than lengthening the distance between the tip of the ilium  
169 and the tip of the sacrum decreased suggesting a forward sliding of the pelvis relative to the sacral joint  
170 during the extension phase of swimming. This suggests that the role of the pelvic joint needs to be re-  
171 evaluated and that its function may be related to escape behavior or even burrowing as previously  
172 suggested (Whiting, 1961; Videler and Jorna, 1985).

173 Although previous studies found no trade-off between jumping and swimming kinematics or  
174 performance (Peters et al., 1996; Kamel et al., 1996; Nauwelaerts et al., 2007) our results suggest subtle  
175 but important differences in the kinematics of swimming that may be the result of specializations to  
176 different life-styles. The principal differences observed are overall changes at the hip that appear to  
177 characterize terrestrial species, and differences in the kinematics of the distal limb elements, more  
178 specifically the foot that appear to characterize semi-aquatic species. Whereas aquatic and terrestrial  
179 species appear to actively recruit the foot in generating propulsion, semi-aquatic species appear to have  
180 a relatively invariant foot angle throughout the limb extension cycle. This may be due to stiffer distal  
181 elements which may diminish the potential for the foot to contribute to the generation of propulsion,  
182 yet this remains to be examined further. These results also suggest that locomotor inferences on extinct  
183 animals may benefit from an examination of these distal elements rather than the often used proximal  
184 elements such as the hip and proximal femur (e.g. Jorgensen and Reilly, 2013; Venczel and Szentesi,  
185 2012). Unfortunately such elements are rare in the fossil record, thus hampering our understanding of  
186 the evolution of locomotion near the base of the anuran tree.

## 187 **Materials and methods**

### 188 *Specimens*

189 Two *Bombina orientalis*, one *Bufo calamita*, two *Rhaebo guttatus*, four *Discoglossus pictus*, three  
190 *Pelobates fuscus*, three *Pipa pipa*, two *Pelophylax esculenta*, and seven *Xenopus laevis* of undetermined  
191 sex yet phylogenetically different backgrounds (Fig. 1) were used in the recordings. Animals were

192 housed individually in a temperature controlled room and provided with food consisting of crickets,  
193 earthworms and waxworms twice weekly. For each individual, the snout-vent length, the length of the  
194 femur, the tibiofibula, and the tarso-metatarsus was measured on X-ray images of anesthetized frogs  
195 (MS222) by digitizing the proximal and distal ends of each limb segment (Table 1). All experiments were  
196 approved by the ethics committee at the University of Antwerp, Belgium.

### 197 *Cineradiography*

198 Animals were recorded in dorso-ventral view while swimming using a Phillips Optimus X-ray unit with a  
199 14 inch image intensifier and coupled to a Redlake Imaging MotionPro 2000 high resolution digital video  
200 camera set at a recording frequency ranging from 250 frames s<sup>-1</sup>. Swimming was recorded in an  
201 experimental tank of 120 by 25 by 50 cm with 10 cm of water restricting swimming to a single horizontal  
202 plane parallel to the image intensifier. Test temperature varied between 20 and 24 °C for all swimming  
203 trials. Swimming was elicited by tapping the animal at the base of the urostyle with a long, thin metal  
204 rod. In all cases the stimulus was provided by the same person and such that the frog was unaware of  
205 the rod before it touched the animal. For smaller species or species that showed a poor degree of  
206 ossification (*D. pictus*, *B. calamita*), small radio-opaque markers were implanted at the different limb  
207 joints of interest to facilitate the analysis of the kinematic data. Markers were implanted percutaneously  
208 using hypodermic needles under full anesthesia with MS222.

209 Five swimming sequences were recorded for each individual and those where the frog stayed in the  
210 plane parallel to the image intensifier were retained for analysis. This resulted in 9 sequences for two  
211 individuals of *B. orientalis*, 17 sequences for four individuals of *D. pictus*, 26 sequences for seven  
212 individuals of *X. laevis*, eight sequences for three *P. pipa*, 16 sequences for 4 *P. fuscus*, five sequences for  
213 one *B. calamita*, eight sequences for two *R. guttatus*, and nine sequences for two *P. esculenta* for a total  
214 of 98 analyzed sequences.

215 On each frame, 21 landmarks were digitized for the limb extension cycle using Didge (version 2.2.0.; A.  
216 Cullum) (Fig. 2) and the X- and Y-coordinates for each point were exported to a spreadsheet. Landmarks  
217 used were (numbers indicated for one side only; see Fig. 2): the tip of the snout (1), the center of the  
218 sacrum (2), the distal end of the ischium (3), the left and right iliosacral joints (4), the left and right  
219 proximal head of the femur (5), the left and right distal end of the femur (6), the left and right proximal  
220 end of the tibiofibula (7), the left and right distal end of the tibiofibula (8), the left and right proximal  
221 end of the proximal tarsals (9), the left and right distal end of the tarsal bones (10), the left and right



222 distal end of the longest metatarsal (11), and the left and right distal end of the terminal phalanx of the  
223 longest toe (12). Next, coordinates were re-calculated to a frame of reference moving with the frog and  
224 with the X-axis parallel to the midline of the frog and the Y-axis going through the sacrum, thus making  
225 landmark 2 the origin of our new reference frame.

226 Based on the X- and Y-coordinates of these landmarks the following kinematic variables were calculated:  
227 the pelvic angle, being the angle subtended by the lines interconnecting landmarks 1 and 3 and 2 and 3  
228 respectively; the hip angle, being the angle subtended by the lines interconnecting landmarks 1 and 3  
229 and 5 and 6 respectively; the knee angle, being the angle subtended by the lines interconnecting  
230 landmarks 5 and 6 and 7 and 8 respectively; the ankle angle, being the angle subtended by the lines  
231 interconnecting landmarks 7 and 8 and 9 and 10 respectively; the mid-foot 1 angle, being the angle  
232 subtended by the lines interconnecting landmarks 9 and 10 and 10 and 11 respectively; the mid-foot 2  
233 angle, being the angle subtended by the lines interconnecting landmarks 10 and 11 and 11 and 12  
234 respectively. The hip angle, knee angle, ankle angle and both mid-foot angles were calculated for both  
235 limb pairs. Additionally, the amount of pelvic sliding was calculated as the difference in the X-coordinate  
236 between markers 2 and 4. Finally, limb extension was calculated as the difference in the X-coordinate  
237 between marker 2 and a virtual tibio-tarsal joint marker calculated as the average between the X-  
238 coordinates of markers 8 and 9 respectively.

239 The displacements of all limb segments were plotted against time and smoothed using a zero phase shift  
240 4th order low pass butterworth filter with user defined cut-off frequency that was set iteratively to  
241 obtain smooth acceleration profiles without losing information in the displacement and velocity profiles  
242 (Winter, 2004). Next, the limb extension cycle was interpolated over 50 time-points allowing us to  
243 compare cycles across individuals and species. After interpolation the velocity and acceleration of  
244 displacements and angular changes were calculated based on numerical differentiation of the  
245 displacement profiles. For statistical analysis, the peak snout velocity, peak snout acceleration, average  
246 velocity, the amount of pelvic sliding, the total limb extension, the peak limb extension and retraction  
247 velocity, the delta pelvic angle, the delta hip angle, the minimal hip angle, the minimal and maximal  
248 angular velocity at the hip (i.e. associated with hip extension and flexion respectively), the delta knee  
249 angle, the minimal knee angle, the minimal and maximal angular velocity at the knee, the delta ankle  
250 angle, the minimal ankle angle, the minimal and maximal angular velocity at the ankle, the delta and  
251 minimal mid-foot 1 angles, and the delta and minimal mid-foot 2 angles were extracted (Table 2). As

252 limb movements are not always perfectly symmetrical, the largest angular displacement and velocity of  
253 the right and left side was retained for further analysis.

#### 254 *Statistical analysis*

255 Species were classified into three broad ecological groups based on literature data. We considered as  
256 aquatic species, species that spend most of their time in water outside of the breeding season. As such  
257 *X. laevis*, *P. pipa* and *B. orientalis* (Kaplan, 1992; Du Preez and Carruthers, 2009; Ouboter and Jairam,  
258 2012) were all classified as aquatic. As terrestrial species we considered species that spend most of their  
259 time away from water outside the breeding season. These species thus cannot be found in the  
260 immediate vicinity of water outside the breeding season and include *B. calamita*, *P. fuscus* and *R.*  
261 *guttatus* (Arnold and Ovenden., 1978; Ouboter and Jairam, 2012). Finally, we classified as semi-aquatic,  
262 species that live near water outside of the breeding season, yet typically jump into the water as an  
263 escape response. These species included *D. pictus* and *P. esculenta* (Arnold and Ovenden., 1978).  
264 However given conflicting statements in the literature concerning *B. orientalis* we ran all our analysis  
265 with this species classified both as aquatic and as semi-aquatic.

266 Next, all raw kinematic variables were averaged per individual. All variables were Log<sub>10</sub>-transformed and  
267 used as input for regression analysis with SVL as the independent variable. Where significant, residuals  
268 were extracted and saved as variables. Next kinematic data (residual for those variables dependent on  
269 overall size) were used as input for a factor analysis with varimax rotation. Factors with eigenvalues over  
270 1 were extracted and factor scores were saved. Factor scores were used to explore how species were  
271 distributed in kinematic space and to select kinematic variables for subsequent analysis. We selected all  
272 variables with loadings higher than 0.7 on the first two axes as input for a multivariate analysis of  
273 variance coupled to subsequent univariate ANOVAs. Bonferroni post-hoc tests were then used to  
274 examine which groups differed from one another for each variable that showed significant effects.

275 As species cannot be considered as independent data points or disconnected from their evolutionary  
276 history comparative analysis have been advocated to take into account shared ancestry in explaining  
277 patterns of phenotypic or functional diversity. However, these approaches typically require a minimum  
278 number of species for these analyses to be robust. Given the time-consuming nature of kinematic  
279 analyses our data set remains restricted. Thus, rather than doing explicit comparative analyses we  
280 decided to map the phylogeny onto the functional space, allowing us to evaluate whether structuring is  
281 driven by phylogeny or not. We did so using the *phylomorphospace* function in R (R Development Core

282 Team, 2011) implemented in the ‘phytools’ library (Revell, 2012). We use two alternative phylogenies  
283 that differ in the placement of the basal most taxa (Pipoidea versus Bombinatoroidea) based on the  
284 phylogenies provided by Frost et al. (2006) and Zhang et al. (2013) and pruned down to include only the  
285 taxa in our analyses (Fig. 1A, B). Moreover we classified *B. orientalis* both as aquatic and as semi-aquatic.  
286 Branch lengths were computed using the Grafen method (1989) with the "compute.brln" function of  
287 the ‘Ape’ library (Paradis et al., 2012) in R (R Development Core Team, 2011).

## 288 **Acknowledgements**

289 This research was supported by a BWS-BOF bilateral cooperative project between Belgium and the  
290 Czech Republic (4/EO1514), an Agence Nationale de la Recherche (ANR) MOBIGEN grant [ANR-09-PEXT-  
291 003], and a Muséum National d’Histoire Naturelle ‘Action Transversale Muséum’ (MNHN) ATM grant of  
292 the programme ‘Biodiversité actuelle et fossile’ to A.H.

## 293 **References**

- 294 **Abourachid, A. and Green, D. M.** (1999). Origins of the frog kick? Alternate-leg swimming in primitive  
295 frogs, families Leiopelmatidae and Ascaphidae. *J. Herpetol.* **33**, 657-663.
- 296 **Arnold, E. N. and Oviden, D.** (1978) Collins field guide to the reptiles and amphibians of Britain and  
297 Europe. London: Harper Collins Ltd.
- 298 **Barclay, O. R.** (1946). The mechanics of amphibian locomotion. *J. Exp. Biol.* **23**, 177-203.
- 299 **Calow, L. J. and Alexander, R. McN.** (1973). A mechanical analysis of a hind leg of a frog *Rana*  
300 *temporaria*. *J. Zool., Lond.* **171**, 293-321.
- 301 **Clemente, C. J. and Richards, C.** (2013). Muscle function and hydrodynamics limit power and speed in  
302 swimming frogs. *Nat. Comm.* **4**, 2737. doi:10.1038/ncomms3737.
- 303 **du Preez, L. and Carruthers, V.** (2009) A complete guide to the frogs of Southern Africa. Cape Town:  
304 Struik Nature.
- 305 **Emerson, S. B.** (1976). Burrowing in frogs. *J. Morphol.* **149**, 437-457.
- 306 **Emerson, S. B.** (1979). The ilio-sacral articulation in frogs: form and function. *Biol. J. Linn. Soc.* **11**, 153-  
307 168.

- 308 **Emerson, S. B. and De Jongh, H. J.** (1980). Muscle activity at the ilio-sacral articulation of frogs. *J.*  
309 *Morphol.* **166**, 129-144.
- 310 **Essner, R. L., Suffian, D. J., Bishop, P. J. and Reilly, S. M.** (2010). Landing in basal frogs: evidence of  
311 saltational patterns in the evolution of anuran locomotion. *Naturwissenschaften* **97**, 935-939.
- 312 **Estes, R. and Reig, O. A.** (1973). The early fossil record of frogs: a review of the evidence. In *Evolutionary*  
313 *biology of the anurans* (ed. J. L. Vial), pp. 11-63. Colombia: University of Missouri Press.
- 314 **Frost, D. R., Grant, T., Faivovich, J., Bain, R. H., Haas, A., Haddad, C. F. B., De Sa, R. O., Channing, A.,**  
315 **Wilkinson, M., Donnellan, S. C., Raxworthy, C. J., Campbell, J. A., Blotto, B. L., Moler, P., Drewes, R. C.,**  
316 **Nussbaum, R. A., Lynch, J. D., Green, D. M. and Wheeler, W. C.** (2006). The amphibian tree of life. *Bull.*  
317 *Am. Mus. Nat. Hist.* **297**, 1-370.
- 318 **Gal, J. M. and Blake, R. W.** (1988). Biomechanics of frog swimming: II. Mechanics of the limb-beat cycle  
319 in *Hymenochirus Boettgeri*. *J. Exp. Biol.* **138**, 413-429.
- 320 **Gans, C. and Parsons, T.** (1966). On the origin of the jumping mechanism in frogs. *Evolution* **20**, 92-99.
- 321 **Gillis, G. B. and Biewener, A. A.** (2000). Hindlimb extensor muscle function during jumping and  
322 swimming in the toad (*Bufo marinus*). *J. Exp. Biol.* **203**, 3547-3563.
- 323 **Grafen, A.** (1989). The phylogenetic regression. *Phil. Trans. R. Soc. Lond. B.* **326**, 119-157.
- 324 **Jenkins, F. A. and Shubin, H. H.** (1998). *Prosalirus bitis* and the anuran caudopelvis mechanism. *J. Vert.*  
325 *Paleontol.* **18**, 495-510.
- 326 **Johansson, L. C. and Lauder, G. V.** (2004). Hydrodynamics of surface swimming in leopard frogs (*Rana*  
327 *pipiens*). *J. Exp. Biol.* **207**, 3945-3958.
- 328 **Jorgensen, M. E. and Reilly, S. M.** (2013). Phylogenetic patterns of skeletal morphometrics and pelvic  
329 traits in relation to locomotor modes in frogs. *J. Evol. Biol.* **26**, 929-943.
- 330 **Kamel, L. T., Peters, S. E. and Bashor, D. P.** (1996). Hopping and swimming in the leopard frog, *Rana*  
331 *pipiens*: II. A comparison of muscle activities. *J. Morphol.* **230**, 17-31.
- 332 **Kaplan, R. H.** (1992) Greater maternal investment can decrease offspring survival in the frog *Bombina*  
333 *orientalis*. *Ecology* **73**, 280-288.

- 334 **Lutz, G. J. and Rome, L. C.** (1994). Built for jumping: the design of the frog muscular system. *Science* **263**,  
335 370-372.
- 336 **Moen, D. S., Irschick, D. J. and Wiens, J. J.** (2013). Evolutionary conservatism and convergence both lead  
337 to striking similarity in ecology, morphology and performance across continents in frogs. *Proc R. Soc.*  
338 *Lond. B.* **280**, 20132156.
- 339 **Nauwelaerts, S. and Aerts, P.** (2002). Two distinct gait types in swimming frogs. *J. Zool., Lond.* **258**, 183-  
340 188.
- 341 **Nauwelaerts, S. and Aerts, P.** (2003). Propulsive impulse as a covarying performance measure in the  
342 comparison of the kinematics of swimming and jumping in frogs. *J. Exp. Biol.* **206**, 4341-4351.
- 343 **Nauwelaerts, S. and Aerts, P.** (2006). Take-off and landing forces in jumping frogs. *J. Exp. Biol.* **209**, 66-  
344 77.
- 345 **Nauwelaerts, S., Aerts, P. and D’Aout, K.** (2001). Speed modulation in swimming frogs. *J. Motor Behav.*  
346 **33**, 265-272.
- 347 **Nauwelaerts, S., Scholliers, J. and Aerts, P.** (2004). A functional analysis of how frogs jump out of water.  
348 *Biol. J. Linn. Soc.* **88**, 413-420.
- 349 **Nauwelaerts, S., Stamhuis, E. and Aerts, P.** (2005a). Swimming and jumping in a semi-aquatic frog.  
350 *Anim. Biol.* **55**, 3-15.
- 351 **Nauwelaerts, S., Stamhuis, E. and Aerts, P.** (2005b). Propulsive force calculations in swimming frogs I. A  
352 momentum-impulse approach. *J. Exp. Biol.* **208**, 1435-1443.
- 353 **Nauwelaerts, S., Ramsay, J. and Aerts, P.** (2007). Morphological correlates of aquatic and terrestrial  
354 locomotion in a semi-aquatic frog, *Rana esculenta*: no evidence for a design conflict. *J. Anat.* **210**, 304-  
355 317.
- 356 **Olson, J. M. and Marsh, R. L.** (1998). Activation patterns and length changes in hindlimb muscles of the  
357 bullfrog *Rana catesbeiana* during jumping. *J. Exp. Biol.* **201**, 2763-2777.
- 358 **Ouboter, P. E. and Jairam, R.** (2012) *Amphibians of Suriname*. Leiden: Brill.
- 359 **Palmer, M.** (1960). Expanded ilio-sacral joint in the toad *Xenopus laevis*. *Nature* **187**: 757.

- 360 **Paradis, E., Bolker, B., Claude, J., Cuong, H. S., Desper, R., Durand, B., Dutheil, J., Gascuel, O., Heibl, C.,**  
361 **Lawson, D., Lefort, V., Legendre, P., Lemon, J., Noel, Y., Nylander, J., Opgen-Rhein, R., Popescu, A.-A.,**  
362 **Schliep, K., Strimmer, K. and de Vienne, D.** (2012). ape: Analyses of phylogenetics and evolution in R  
363 language. *Bioinformatics* **20**, 289-290.
- 364 **Peters, S. E., Kamel, L. T. and Bashor, D. P.** (1996). Hopping and swimming in the Leopard Frog, *Rana*  
365 *pipiens*: I. Step cycles and kinematics. *J. Morphol.* **230**, 1-16.
- 366 **Prikryl, T., Aerts, P., Havelková, P., Herrel, A. and Rocek, Z.** (2009). Pelvic and thigh musculature in frogs  
367 (Anura) and origin of anuran jumping locomotion. *J. Anat.* **214**, 100-139.
- 368 **R Development Core Team** (2011). R: A language and environment for statistical computing. R  
369 Foundation for Statistical Computing. Vienna: R Foundation for Statistical Computing. Available at:  
370 <http://www.R-project.org>.
- 371 **Reilly, S. M. and Jorgensen, M. E.** (2011). The evolution of jumping in frogs: morphological evidence for  
372 the basal anuran locomotor condition and the radiation of locomotor systems in crown group anurans. *J.*  
373 *Morphol.* **272**, 149-168.
- 374 **Revell, L. J.** (2012). phytools: An R package for phylogenetic comparative biology (and other things).  
375 *Methods Ecol. Evol.* **3**, 217-223.
- 376 **Richards, C. T.** (2008). The kinematic determinants of anuran swimming performance: an inverse and  
377 forward dynamics approach. *J. Exp. Biol.* **211**, 3181-3194.
- 378 **Richards, C. T.** (2010). Kinematics and hydrodynamics analysis of swimming anurans reveals striking  
379 interspecific differences in the mechanism for producing thrust. *J. Exp. Biol.* **213**, 621-634.
- 380 **Richards, C. T. and Biewener, A. A.** (2007). Modulation of in vivo muscle power output during swimming  
381 in the African clawed frog (*Xenopus laevis*). *J. Exp. Biol.* **210**, 3147-3159.
- 382 **Shubin, N. H. and Jenkins, F. A.** (1995). An early jurassic jumping frog. *Nature* **377**, 49-52.
- 383 **Sigurdson, T., Green, D. M. and Bishop, P. J.** (2012). Did *Triadobatrachus* jump? Morphology and  
384 evolution of the anuran forelimb in relation to locomotion in early salientians. *Fieldiana* **5**, 77-89.
- 385 **Stamhuis, E. and Nauwelaerts, S.** (2005). Propulsive force calculations in swimming frogs II. Application  
386 of a vortex ring model to DPIV data. *J. Exp. Biol.* **208**, 1445-1451.

- 387 **Venczel, M. and Szentesi, Z.** (2012). Locomotory techniques in Upper Cretaceous frogs (Iharkut,  
388 Hungary). *Hantkeniana* **7**, 19-25.
- 389 **Videler, J. J. and Jorna, J. T.** (1985). Functions of the sliding pelvis in *Xenopus laevis*. *Copeia* **1985**, 251-  
390 254.
- 391 **Whiting, H. P.** (1961). Pelvic girdle in amphibian locomotion. *Symp. Soc. Exp. Biol.* **5**, 43-58.
- 392 **Winter, D. A.** (2004) *Biomechanics and Motor Control of Human Movement*. New York, NY: John Wiley  
393 and Sons.
- 394 **Zhang, P., Liang, D., Mao, R. L., Hillis, D. M., Wake, D. B. and Cannatella, D. C.** (2013) Efficient  
395 sequencing of anuran mtDNAs and a mitogenomic exploration of the phylogeny and evolution of frogs.  
396 *Mol. Biol. Evol.* doi:10.1093/molbev/mst091.
- 397 **Zug, G. R.** (1978). Anuran locomotion-structure and function, 2, jumping performance of semiaquatic,  
398 terrestrial and arboreal frogs. *Smithson Contrib. Zool.* **276**, 1-30.

### 399 **Figure legends**

400 **Figure 1:** A) Phylogenetic tree based on Frost et al., 2006 showing the relationships between the species  
401 included in this study. Indicated are also the ecologies of each species. B) Phylogenetic tree based on  
402 Zhang et al. (2013).

403 **Figure 2:** X-ray image of a *Xenopus* frog during swimming. Indicated are the points used for digitization  
404 and the kinematic variables calculated based on the X-Y coordinates of these landmarks. See methods  
405 for a description of the landmarks and angles.

406 **Figure 3:** Mean kinematic profiles for a specialized aquatic species, *Xenopus laevis*. Indicated from top to  
407 bottom are the changes in limb extension, hip angle, knee angle, ankle angle, and mid-foot 1 and mid-  
408 foot 2 angles over time. Time is standardized relative to the duration of the limb extension cycle, and  
409 the dashed lines represent one standard deviation from the mean.

410 **Figure 4:** Mean kinematic profiles for a semi-aquatic species, *Discoglossus pictus*. Indicated from top to  
411 bottom are the changes in limb extension, hip angle, knee angle, ankle angle, and mid-foot 1 and mid-  
412 foot 2 angles over time. Time is standardized relative to the duration of the limb extension cycle, and  
413 the dashed lines represent one standard deviation from the mean.

414 **Figure 5:** Mean kinematic profiles for a terrestrial species, *Pelobates fuscus*. Indicated from top to  
415 bottom are the changes in limb extension, hip angle, knee angle, ankle angle, and mid-foot 1 and mid-  
416 foot 2 angles over time. Time is standardized relative to the duration of the limb extension cycle, and  
417 the dashed lines represent one standard deviation from the mean.

418 **Figure 6:** Results of a principal component analysis performed on the raw kinematic means for each  
419 individual. A) plot of the first two axes with *B. orientalis* classified as aquatic; B) plot of the first two axes  
420 with *B. orientalis* classified as semi-aquatic. Colors indicate the different ecologies with white symbols  
421 indicating aquatic species, black symbols indicating terrestrial species and grey symbols indicating semi-  
422 aquatic species. Symbols represent species as follows: squares, *D. pictus*; cross, *P. esculenta*; star, *B*  
423 *calamita*; hexagon, *R. guttatus*; diamond, *P. fuscus*; triangle up, *X. laevis*; triangle down, *P. pipa*; circle, *B.*  
424 *orientalis*.

425 **Figure 7:** Results of a principal component analysis performed on species means of the kinematic  
426 variables. The phylogeny is plotted in the kinematic space. Colors indicate the different ecologies with  
427 white symbols indicating aquatic species, black symbols indicating terrestrial species and grey symbols  
428 indicating semi-aquatic species. Note how species with similar ecologies are not closely related and how  
429 the structuring in kinematic space is not driven by phylogeny but rather by ecology. A) phylogeny based  
430 on Frost et al (2006) *B. orientalis* classified as aquatic; B) phylogeny based on Zhang et al. (2013) with *B.*  
431 *orientalis* classified as aquatic; C) phylogeny based on Frost et al (2006) *B. orientalis* classified as semi-  
432 aquatic; D) phylogeny based on Zhang et al. (2013) with *B. orientalis* classified as semi-aquatic;

433 **Figure S1:** Mean kinematic profiles for an aquatic species, *Bombina orientalis*. Indicated from top to  
434 bottom are the changes in limb extension, hip angle, knee angle, ankle angle, and mid-foot 1 and mid-  
435 foot 2 angles over time. Time is standardized relative to the duration of the limb extension cycle, and  
436 the dashed lines represent one standard deviation from the mean.

437 **Figure S2:** Mean kinematic profiles for a terrestrial species, *Bufo calamita*. Indicated from top to bottom  
438 are the changes in limb extension, hip angle, knee angle, ankle angle, and mid-foot 1 and mid-foot 2  
439 angles over time. Time is standardized relative to the duration of the limb extension cycle, and the  
440 dashed lines represent one standard deviation from the mean.

441 **Figure S3:** Mean kinematic profiles for a terrestrial species, *Rhaebo guttatus*. Indicated from top to  
442 bottom are the changes in limb extension, hip angle, knee angle, ankle angle, and mid-foot 1 and mid-



443 foot 2 angles over time. Time is standardized relative to the duration of the limb extension cycle, and  
444 the dashed lines represent one standard deviation from the mean.

445 **Figure S4:** Mean kinematic profiles for an aquatic species, *Pipa pipa*. Indicated from top to bottom are  
446 the changes in limb extension, hip angle, knee angle, ankle angle, and mid-foot 1 and mid-foot 2 angles  
447 over time. Time is standardized relative to the duration of the limb extension cycle, and the dashed lines  
448 represent one standard deviation from the mean.

449 **Figure S5:** Mean kinematic profiles for a semi-aquatic species, *Pelophylax esculenta*. Indicated from top  
450 to bottom are the changes in limb extension, hip angle, knee angle, ankle angle, and mid-foot 1 and mid-  
451 foot 2 angles over time. Time is standardized relative to the duration of the limb extension cycle, and  
452 the dashed lines represent one standard deviation from the mean.

453 **Figure S6:** Mean kinematic profiles describing the pelvic sliding in the different species. Time is  
454 standardized relative to the duration of the limb extension cycle, and the dashed lines represent one  
455 standard deviation from the mean.

**Table 1:** morphometric data for the specimens used for the kinematic analyses.

| species                     | # individuals | SVL          | femur      | tibiofibula | tarsus     |
|-----------------------------|---------------|--------------|------------|-------------|------------|
| <i>Bombina orientalis</i>   | 2             | 52 ± 1.4     | 17.8 ± 1.2 | 18.2 ± 0.7  | 12.4 ± 0.3 |
| <i>Discoglossus pictus</i>  | 4             | 55.8 ± 5.4   | 20.5 ± 2.1 | 20.4 ± 2.5  | 10.7 ± 1.5 |
| <i>Xenopus laevis</i>       | 7             | 134.9 ± 19.2 | 42.5 ± 3.4 | 42.9 ± 4.0  | 24.7 ± 1.9 |
| <i>Pipa pipa</i>            | 3             | 129.3 ± 6.0  | 44.4 ± 2.1 | 39.4 ± 2.3  | 21.8 ± 1.0 |
| <i>Pelobates fuscus</i>     | 4             | 52.5 ± 2.5   | 19.2 ± 1.7 | 15.6 ± 1.3  | 8.6 ± 1.0  |
| <i>Bufo calamita</i>        | 1             | 52           | 14.4       | 14.4        | 7.8        |
| <i>Rhaebo guttatus</i>      | 2             | 129.5 ± 2.1  | 43.6 ± 1.8 | 39.5 ± 0.8  | 21.7 ± 2.8 |
| <i>Pelophylax esculenta</i> | 2             | 69.5 ± 21.9  | 30.7 ± 6.9 | 30.2 ± 6.7  | 15.1 ± 2.3 |

All measurements are lengths in mm. SVL, snout-vent length.

**Table 2:** summary swimming kinematics for the species used.

|                       |                         | <i>B. orientalis</i> | <i>D. pictus</i> | <i>X. laevis</i> | <i>P. pipa</i> | <i>P. fuscus</i> | <i>B. calamita</i> | <i>R. guttatus</i> | <i>P. esculenta</i> |
|-----------------------|-------------------------|----------------------|------------------|------------------|----------------|------------------|--------------------|--------------------|---------------------|
| <b>snout speed</b>    | Max (m/s)               | 0.4 ± 0.2            | 0.6 ± 0.2        | 0.5 ± 0.2        | 0.5 ± 0.2      | 0.4 ± 0.3        | 0.3 ± 0.07         | 0.5 ± 0.09         | 0.5 ± 0.2           |
| <b>snout acc.</b>     | Min (m/s <sup>2</sup> ) | -5.8 ± 6.5           | -14.1 ± 15.6     | -13.8 ± 12.4     | -17.8 ± 13.7   | -5.2 ± 5.6       | -1.9 ± 0.5         | -16.3 ± 5.1        | -5.3 ± 3.5          |
| <b>average vel.</b>   | (m/s)                   | 0.03 ± 0.01          | 0.04 ± 0.01      | 0.08 ± 0.03      | 0.08 ± 0.02    | 0.03 ± 0.01      | 0.03 ± 0.001       | 0.08 ± 0.02        | 0.05 ± 0.01         |
| <b>pelvic shift</b>   | Δ (mm)                  | 1.3 ± 0.4            | 2.0 ± 1.7        | 4.1 ± 1.9        | 4.2 ± 2.3      | 2.0 ± 0.7        | 2.6 ± 0.9          | 3.7 ± 1.7          | 1.2 ± 0.3           |
| <b>limb extension</b> | Δ (mm)                  | 18.2 ± 5.7           | 33.3 ± 8.5       | 42.3 ± 17.6      | 48.8 ± 12.5    | 29.3 ± 8.1       | 20.8 ± 2.4         | 60.4 ± 9.0         | 38.8 ± 7.0          |
|                       | Max vel. (mm/s)         | 277.1 ± 134.8        | 1763.1 ± 2961.0  | 521.4 ± 913.3    | 429.5 ± 201.6  | 2720.3 ± 8787.2  | 285.9 ± 101.9      | 750.4 ± 93.2       | 542.9 ± 236.6       |
| <b>pelvic angle</b>   | Δ (°)                   | 4.5 ± 1.8            | 7.2 ± 2.4        | 6.2 ± 3.6        | 5.8 ± 2.3      | 8.4 ± 3.9        | 14.0 ± 10.0        | 3.2 ± 0.8          | 5.4 ± 3.2           |
| <b>hip angle</b>      | hip ^                   | 51.6 ± 10.0          | 62.8 ± 15.5      | 50.7 ± 24.5      | 46.1 ± 17.6    | 76.9 ± 27.0      | 70.8 ± 4.6         | 70.9 ± 14.2        | 65.4 ± 25.6         |
|                       | Min (°)                 | 94.4 ± 11.9          | 90.3 ± 14.9      | 91.6 ± 20.2      | 79.7 ± 17.3    | 72.9 ± 16.9      | 55.6 ± 6.0         | 67.3 ± 11.7        | 83.8 ± 19.0         |
|                       | Max vel. (°/s)          | 813.0 ± 333.1        | 1292.5 ± 453.9   | 428.3 ± 279.4    | 392.0 ± 173.4  | 1350.5 ± 491.6   | 911.8 ± 262.9      | 859.6 ± 51.5       | 1111.2 ± 747.6      |
| <b>knee angle</b>     | Δ (°)                   | 93.8 ± 41.1          | 119.6 ± 29.6     | 86.8 ± 36.5      | 67.4 ± 22.6    | 112.4 ± 32.4     | 97.2 ± 8.3         | 120.8 ± 19.6       | 117.6 ± 25.4        |
|                       | Min (°)                 | 34.7 ± 11.5          | 19.7 ± 9.3       | 26.0 ± 16.7      | 26.2 ± 9.6     | 5.9 ± 4.2        | 14.8 ± 9.4         | 13.9 ± 5.4         | 20.4 ± 14.2         |
|                       | Max vel. (°/s)          | 1455.0 ± 887.9       | 2587.6 ± 883.0   | 785.4 ± 445.0    | 562.8 ± 218.6  | 2076.0 ± 864.7   | 1198.4 ± 409.8     | 1607.2 ± 247.6     | 1931.1 ± 1125.0     |
| <b>ankle angle</b>    | Δ (°)                   | 111.7 ± 32.6         | 130.7 ± 23.7     | 92.4 ± 26.9      | 51.9 ± 22.5    | 77.9 ± 36.3      | 79.8 ± 11.2        | 114.1 ± 34.1       | 112.0 ± 15.9        |
|                       | Min (°)                 | 38.9 ± 4.7           | 29.9 ± 10.2      | 50.1 ± 7.4       | 69.9 ± 6.5     | 83.2 ± 12.4      | 69.4 ± 11.03       | 21.6 ± 11.6        | 46.9 ± 7.1          |
|                       | Max vel. (°/s)          | 1852.4 ± 831.7       | 3207.6 ± 964.9   | 946.8 ± 554.4    | 494.2 ± 201.9  | 1348.0 ± 609.3   | 1083.5 ± 384.8     | 1733.8 ± 322.6     | 1874.3 ± 924.9      |
| <b>midfoot 1</b>      | Δ (°)                   | 41.4 ± 7.0           | 15.8 ± 5.6       | 71.7 ± 14.0      | 42.2 ± 19.5    | 85.0 ± 28.4      | 45.7 ± 11.0        | 78.3 ± 38.6        | 47.0 ± 14.4         |
|                       | Min (°)                 | 134.4 ± 6.6          | 160.1 ± 5.3      | 88.2 ± 8.6       | 86.3 ± 3.3     | 83.7 ± 14.5      | 121.0 ± 9.2        | 104.5 ± 5.6        | 125.2 ± 16.7        |
| <b>midfoot 2</b>      | Δ (°)                   | 41.4 ± 13.6          | 25.3 ± 14.5      | 65.1 ± 21.7      | 54.2 ± 21.1    | 69.0 ± 34.4      | 38.4 ± 14.5        | 125.5 ± 24.0       | 51.7 ± 37.5         |
|                       | Min (°)                 | 128.6 ± 12.1         | 148.9 ± 14.7     | 104.0 ± 20.2     | 106.6 ± 21.0   | 109.2 ± 23.9     | 130.0 ± 13.8       | 58.2 ± 11.9        | 123.0 ± 36.5        |

Acc, acceleration; Δ, delta; Min, minimum; max, maximum; vel, velocity

**Table 3:** results of a factor analysis performed on the kinematic data.

|                                  | Factor 1     | Factor 2      | Factor 3     | Factor 4     |
|----------------------------------|--------------|---------------|--------------|--------------|
| % variance explained             | 35.68        | 18.42         | 14.20        | 10.85        |
| Res. min. snout acceleration     | 0.610        | 0.292         | 0.004        | 0.368        |
| Res. average snout velocity      | 0.021        | -0.080        | 0.053        | <b>0.926</b> |
| Res. pelvic shift                | 0.194        | -0.099        | <b>0.706</b> | 0.214        |
| Res. $\Delta$ limb extension     | 0.600        | -0.153        | 0.101        | 0.601        |
| Res. max. hip angular velocity   | <b>0.923</b> | -0.039        | 0.057        | -0.164       |
| Res. max. knee angular velocity  | <b>0.959</b> | -0.022        | -0.088       | 0.076        |
| Res. max. ankle angular velocity | <b>0.838</b> | 0.201         | -0.371       | 0.146        |
| Max. snout velocity              | 0.666        | 0.059         | -0.075       | 0.453        |
| Max. limb extension velocity     | <b>0.705</b> | 0.097         | 0.315        | 0.153        |
| $\Delta$ pelvic angle            | 0.371        | 0.305         | <b>0.735</b> | -0.104       |
| $\Delta$ hip angle               | <b>0.866</b> | -0.056        | 0.266        | -0.204       |
| $\Delta$ knee angle              | <b>0.893</b> | 0.003         | 0.013        | 0.220        |
| Min. knee angle                  | -0.606       | 0.286         | -0.304       | 0.403        |
| $\Delta$ ankle angle             | 0.620        | 0.292         | -0.388       | 0.215        |
| Min. ankle angle                 | -0.328       | -0.147        | 0.813        | -0.058       |
| Min. midfoot 1 angle             | 0.176        | <b>0.774</b>  | -0.487       | 0.042        |
| Min. midfoot 2 angle             | -0.086       | <b>0.866</b>  | 0.351        | -0.142       |
| $\Delta$ midfoot 1 angle         | -0.090       | <b>-0.875</b> | 0.232        | -0.159       |
| $\Delta$ midfoot 2 angle         | 0.019        | <b>-0.959</b> | -0.054       | 0.140        |

Bolded loadings represent loadings greater than 0.7 and indicate variables contributing strongly to a factor.

**Table 4:** results of the uni-variate anova's performed on the raw kinematic data.

| Variable                            | $F_{2,22}$ | $P$     |
|-------------------------------------|------------|---------|
| <i>B. orientalis</i> = aquatic      |            |         |
| $\Delta$ hip angle                  | 5.13       | 0.015   |
| $\Delta$ knee angle                 | 4.61       | 0.021   |
| min. midfoot 1 angle                | 14.90      | < 0.001 |
| min. midfoot 2 angle                | 3.87       | 0.036   |
| $\Delta$ midfoot 1 angle            | 16.16      | < 0.001 |
| $\Delta$ midfoot 2 angle            | 8.12       | < 0.001 |
| <i>B. orientalis</i> = semi-aquatic |            |         |
| $\Delta$ hip angle                  | 4.81       | 0.018   |
| $\Delta$ knee angle                 | 3.44       | 0.05    |
| min. midfoot 1 angle                | 35.27      | < 0.001 |
| min. midfoot 2 angle                | 4.64       | 0.021   |
| $\Delta$ midfoot 1 angle            | 13.71      | < 0.001 |
| $\Delta$ midfoot 2 angle            | 8.66       | 0.002   |

Figure 01

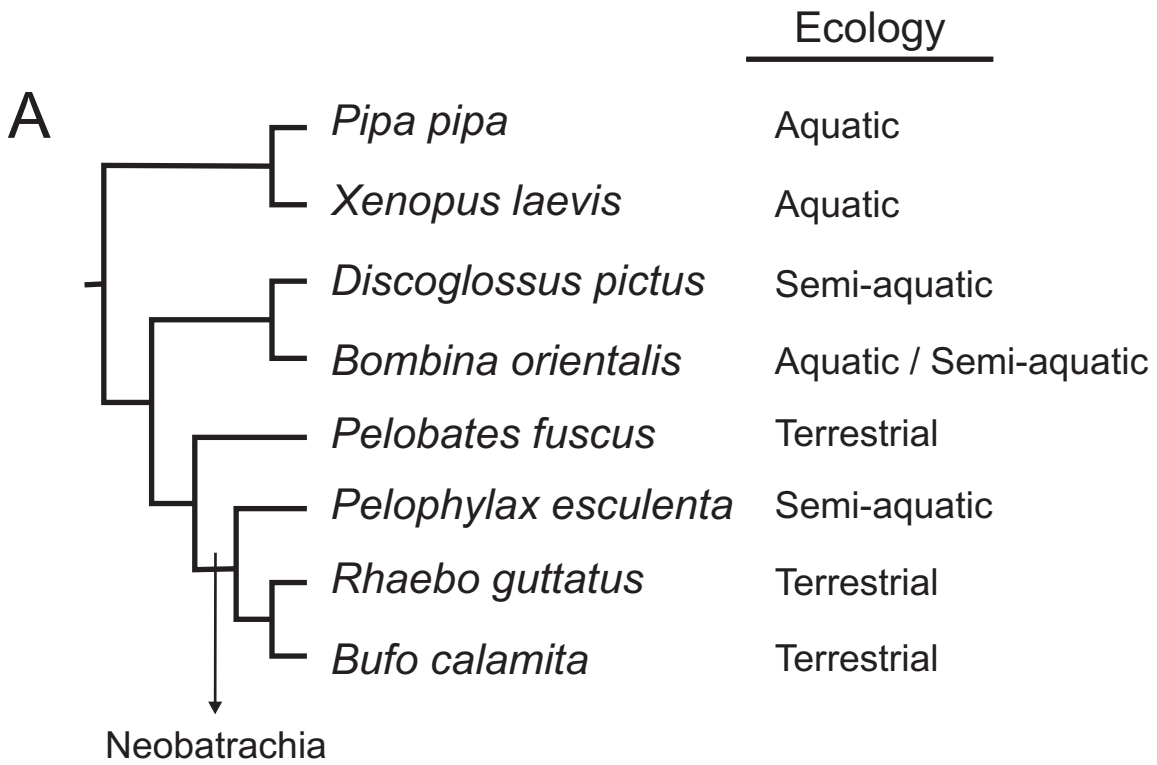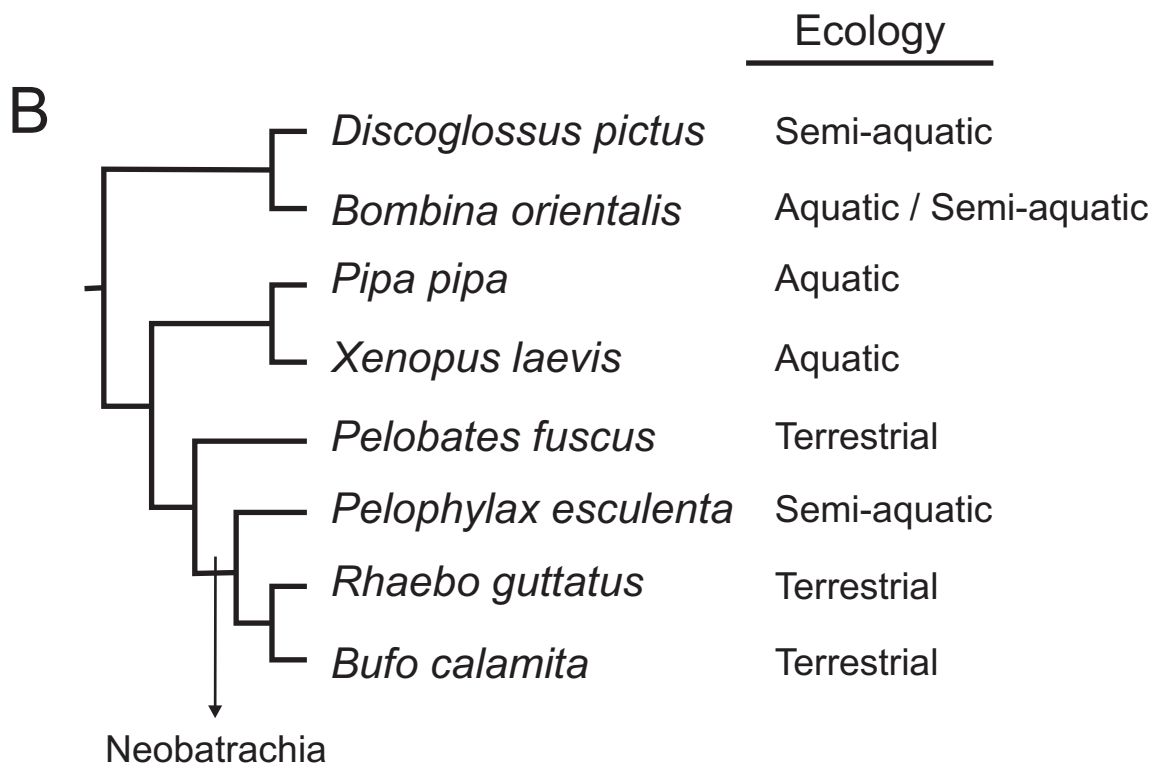

Figure 02

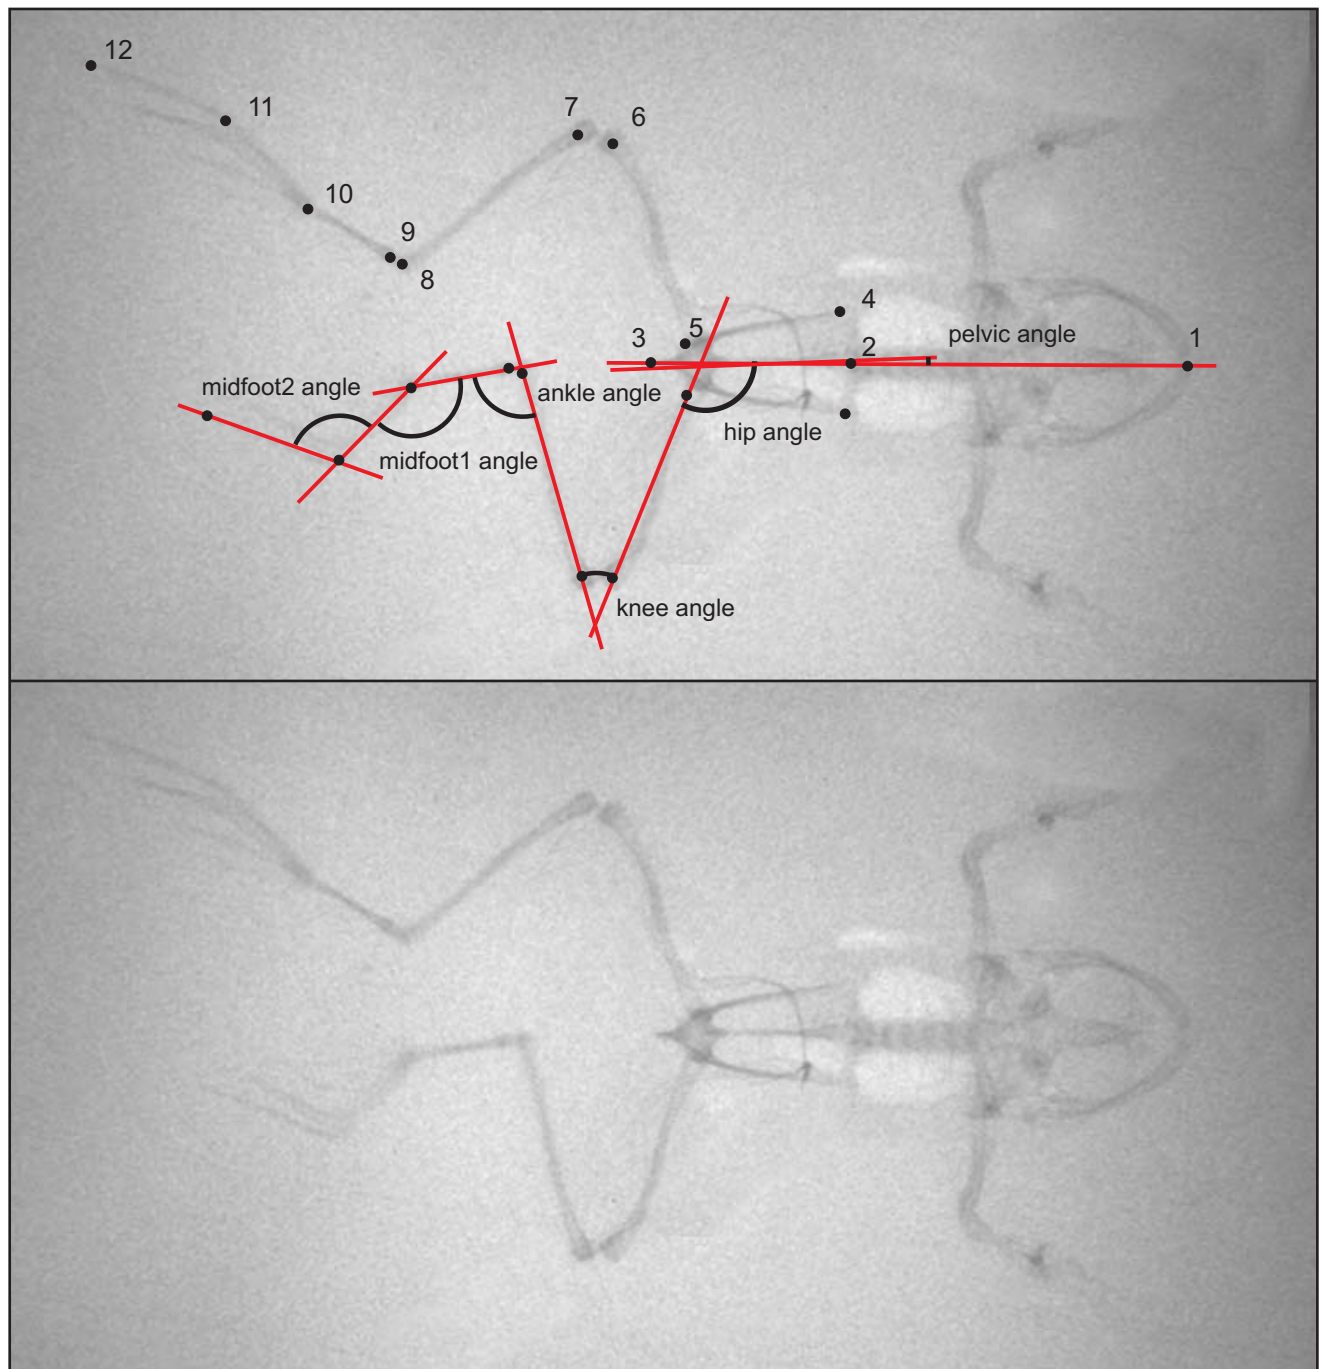

Figure 03

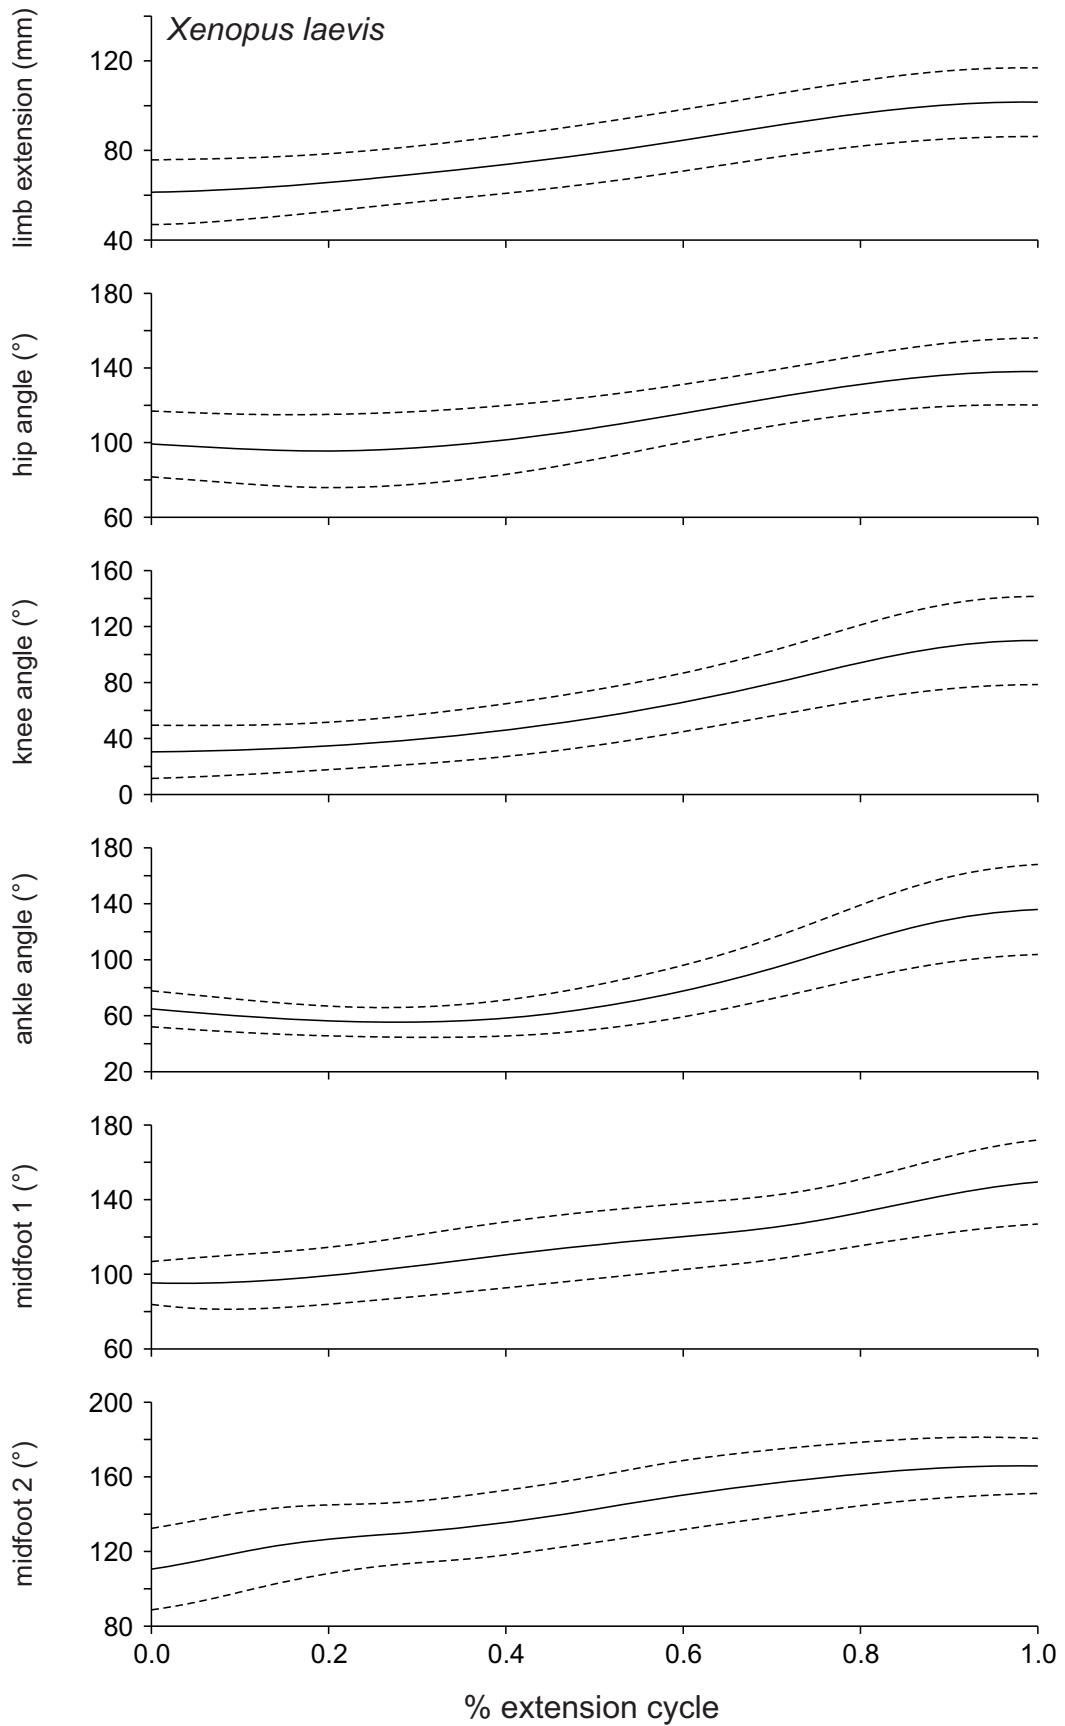



Figure 04

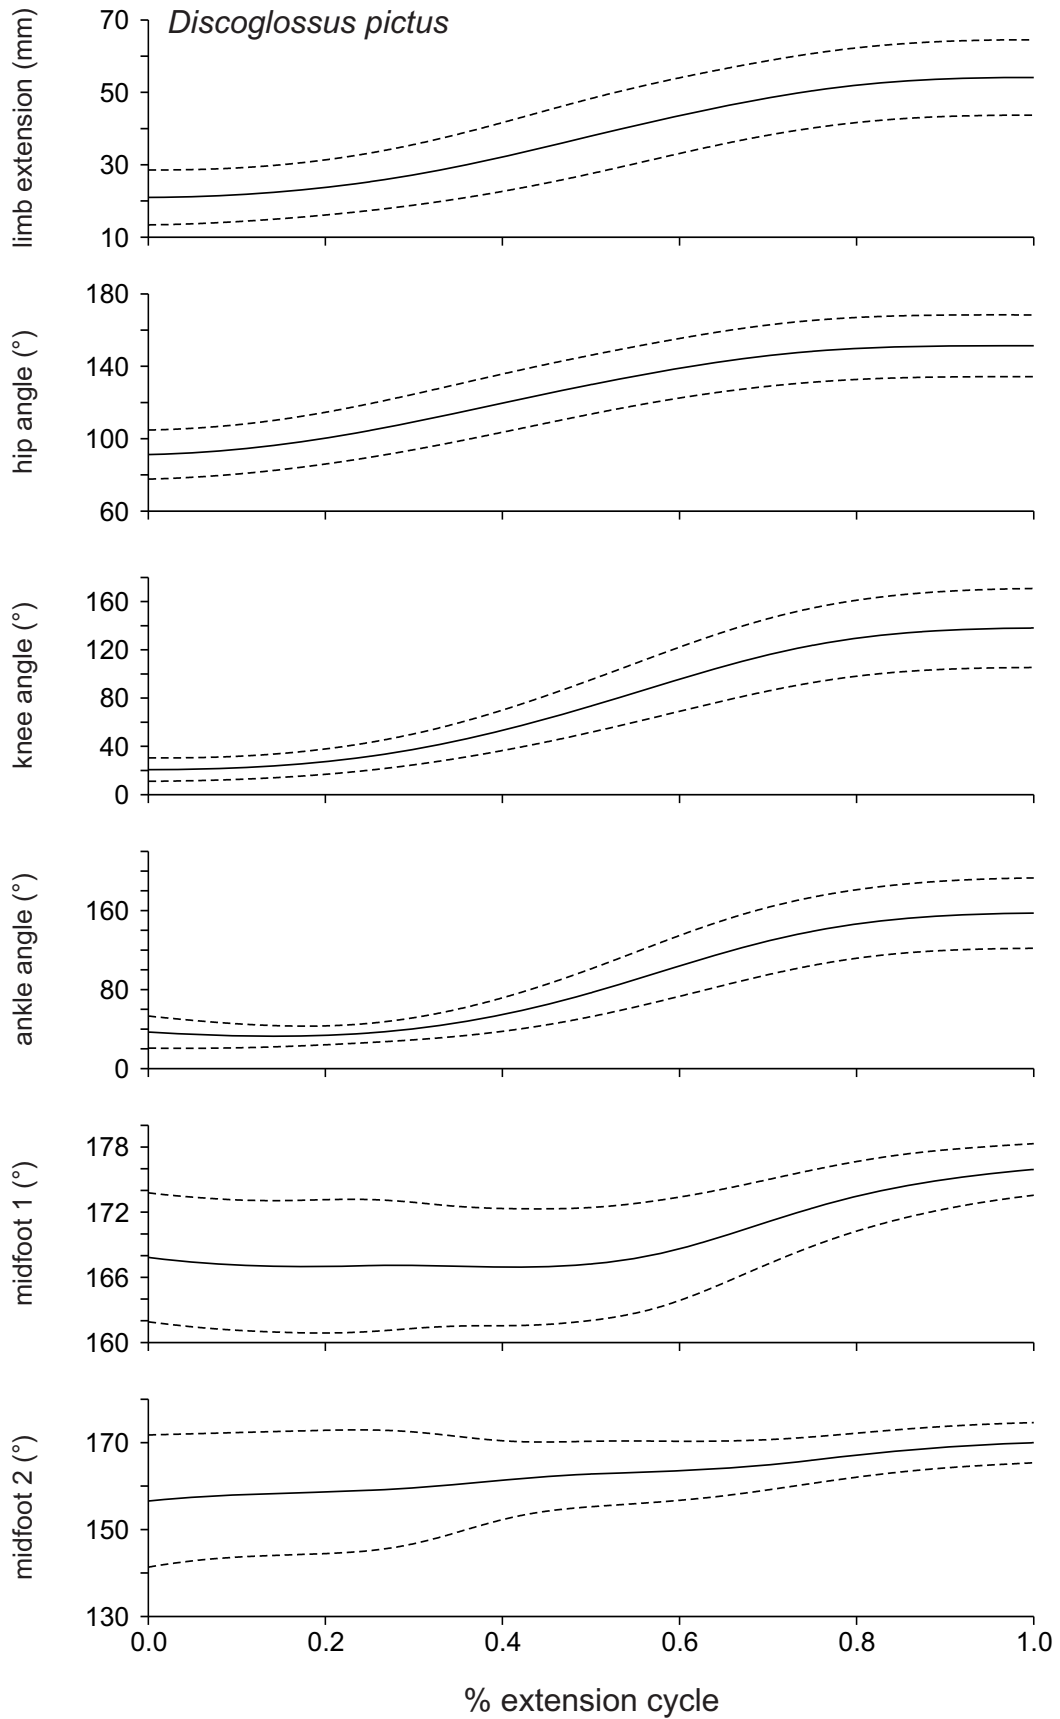

Figure 05

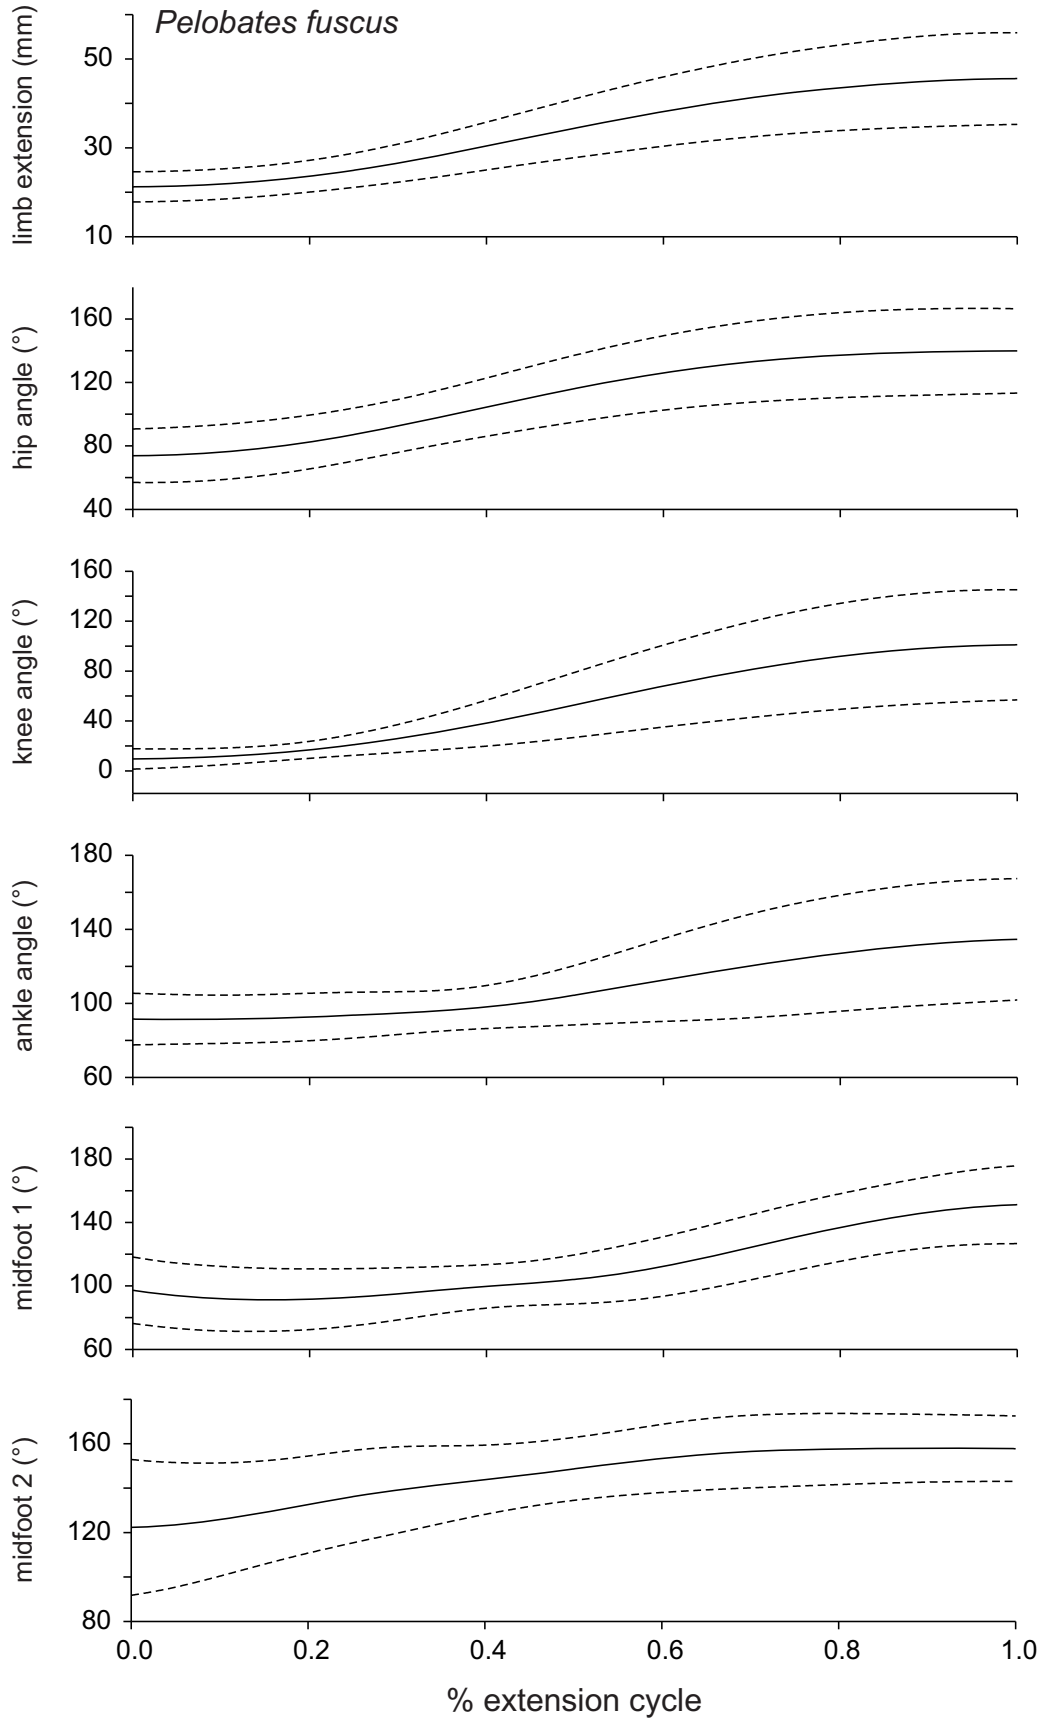

Figure 06

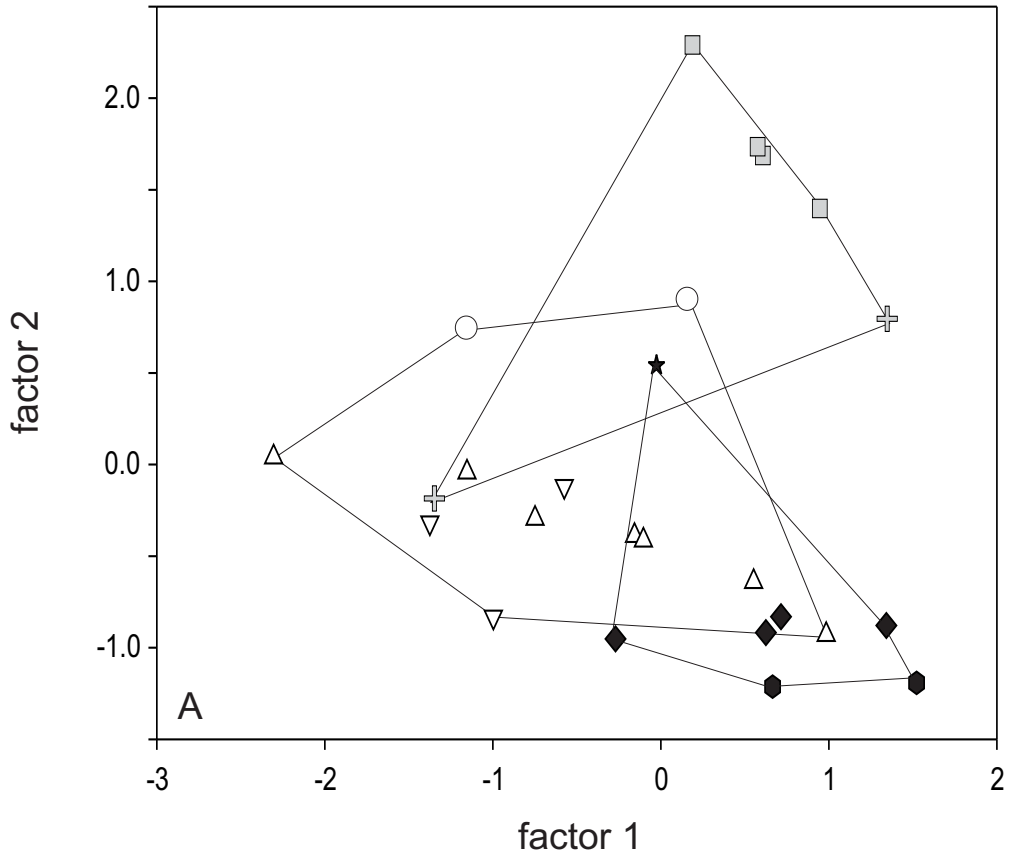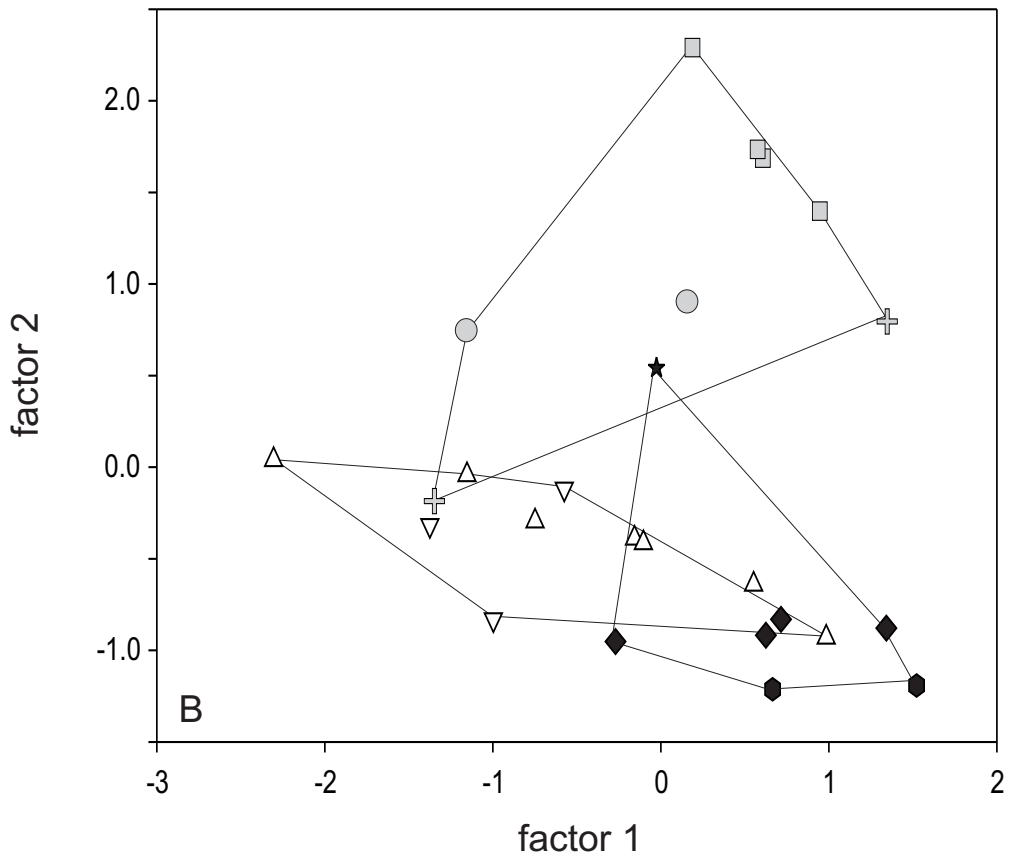

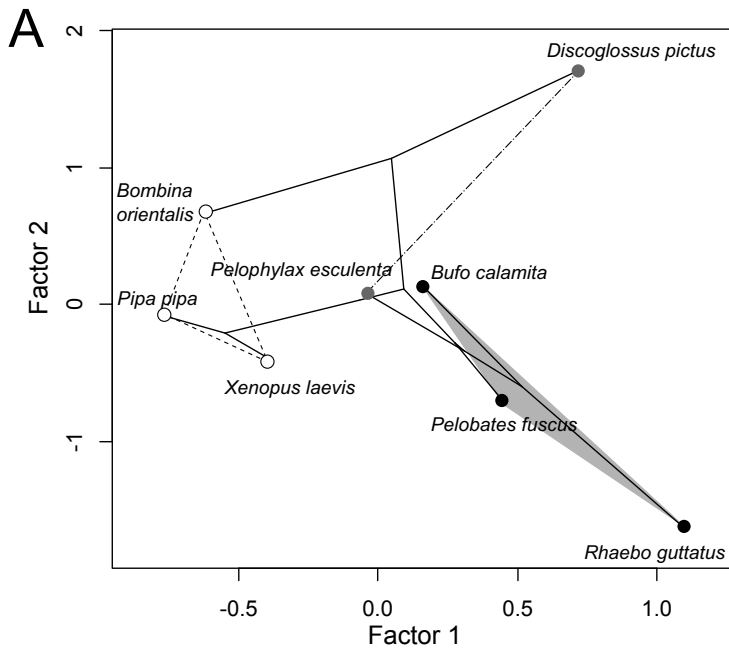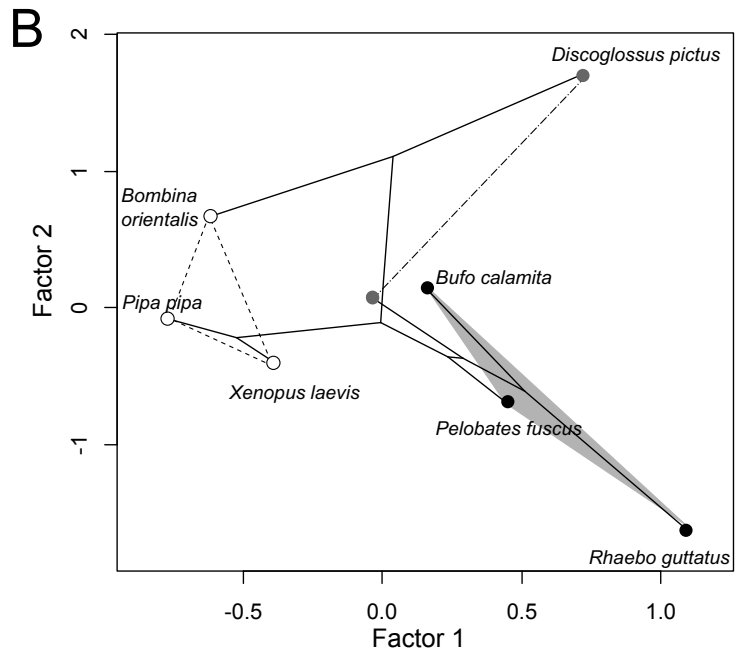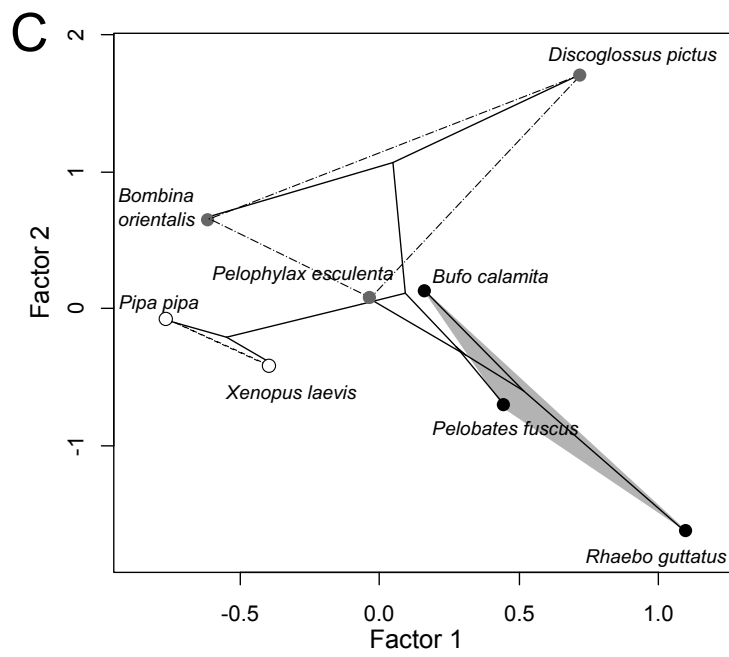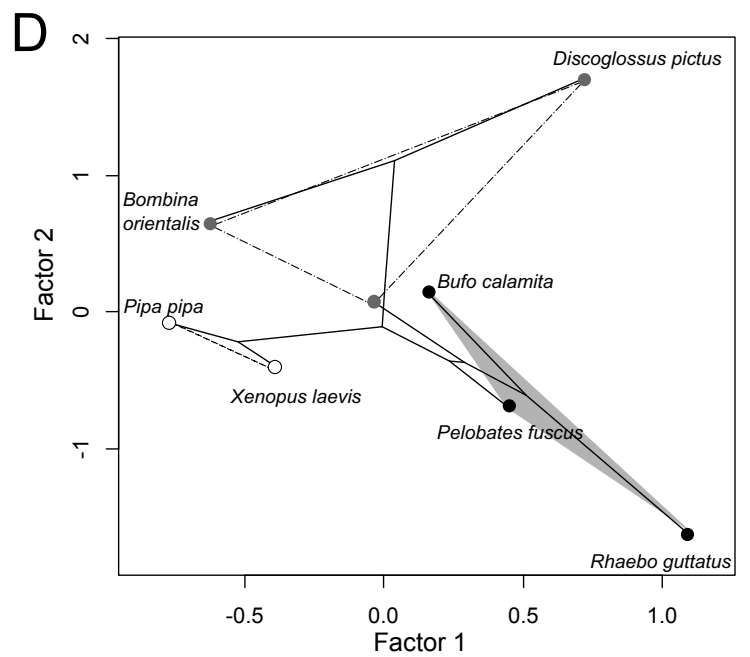

Source: https://cob.silverchair.com/jeb/article-pdf/doi/10.1242/jeb.109991/2037862/jeb_109991.pdf
